# Supplementary material
Source: PubMed Central journal article supplement (PMC8331074)
Supplement: NIHMS1700821-supplement-Reporting_Summary.pdf [file NIHMS1700821-supplement-Reporting_Summary.pdf]

## Reporting Summary

Nature Research wishes to improve the reproducibility of the work that we publish. This form provides structure for consistency and transparency in reporting. For further information on Nature Research policies, see [Authors & Referees](#) and the [Editorial Policy Checklist](#).

### Statistics

For all statistical analyses, confirm that the following items are present in the figure legend, table legend, main text, or Methods section.

n/a Confirmed

- |                                     |                                     |                                                                                                                                                                                                                                                            |
|-------------------------------------|-------------------------------------|------------------------------------------------------------------------------------------------------------------------------------------------------------------------------------------------------------------------------------------------------------|
| <input type="checkbox"/>            | <input checked="" type="checkbox"/> | The exact sample size ( $n$ ) for each experimental group/condition, given as a discrete number and unit of measurement                                                                                                                                    |
| <input type="checkbox"/>            | <input checked="" type="checkbox"/> | A statement on whether measurements were taken from distinct samples or whether the same sample was measured repeatedly                                                                                                                                    |
| <input type="checkbox"/>            | <input checked="" type="checkbox"/> | The statistical test(s) used AND whether they are one- or two-sided<br><i>Only common tests should be described solely by name; describe more complex techniques in the Methods section.</i>                                                               |
| <input type="checkbox"/>            | <input checked="" type="checkbox"/> | A description of all covariates tested                                                                                                                                                                                                                     |
| <input type="checkbox"/>            | <input checked="" type="checkbox"/> | A description of any assumptions or corrections, such as tests of normality and adjustment for multiple comparisons                                                                                                                                        |
| <input type="checkbox"/>            | <input checked="" type="checkbox"/> | A full description of the statistical parameters including central tendency (e.g. means) or other basic estimates (e.g. regression coefficient) AND variation (e.g. standard deviation) or associated estimates of uncertainty (e.g. confidence intervals) |
| <input type="checkbox"/>            | <input checked="" type="checkbox"/> | For null hypothesis testing, the test statistic (e.g. $F$ , $t$ , $r$ ) with confidence intervals, effect sizes, degrees of freedom and $P$ value noted<br><i>Give <math>P</math> values as exact values whenever suitable.</i>                            |
| <input checked="" type="checkbox"/> | <input type="checkbox"/>            | For Bayesian analysis, information on the choice of priors and Markov chain Monte Carlo settings                                                                                                                                                           |
| <input type="checkbox"/>            | <input checked="" type="checkbox"/> | For hierarchical and complex designs, identification of the appropriate level for tests and full reporting of outcomes                                                                                                                                     |
| <input type="checkbox"/>            | <input checked="" type="checkbox"/> | Estimates of effect sizes (e.g. Cohen's $d$ , Pearson's $r$ ), indicating how they were calculated                                                                                                                                                         |

*Our web collection on [statistics for biologists](#) contains articles on many of the points above.*

### Software and code

Policy information about [availability of computer code](#)

|                 |                                                                                                                                                                                                                                                                                                                    |
|-----------------|--------------------------------------------------------------------------------------------------------------------------------------------------------------------------------------------------------------------------------------------------------------------------------------------------------------------|
| Data collection | FACS Diva (BD), SH800S (Sony), ZEN Black (Zeiss), Imaris (Bitplane), ImageStudio (LI-COR), Inveon microPET-CT (Siemens), Cobra II $\gamma$ counter (Packard-Perkin Elmer), GenePix Pro7 software (Molecular Devices), NDP.view2 (Hamamatsu), SkanIT Fisher Scientific, and Typhoon 9410 ImageQuant (Perkin Elmer). |
| Data analysis   | Cytobank, FlowJo (Treestar), Prism 7 (GraphPad), R (DESeq2, ggplot2, tidyverse), ImageJ/ Fiji (NIH), GeneAnalytics, Excel (Microsoft), MaxQuant (Max Planck), Perseus (Max Planck), VivoQuant (v4.0, inviCRO), STAR, bcl2fastq, HTSEQ (v0.6.1p1), and Cell Ranger (10X Genomics).                                  |

For manuscripts utilizing custom algorithms or software that are central to the research but not yet described in published literature, software must be made available to editors/reviewers. We strongly encourage code deposition in a community repository (e.g. GitHub). See the Nature Research [guidelines for submitting code & software](#) for further information.

### Data

Policy information about [availability of data](#)

All manuscripts must include a [data availability statement](#). This statement should provide the following information, where applicable:

- Accession codes, unique identifiers, or web links for publicly available datasets
- A list of figures that have associated raw data
- A description of any restrictions on data availability

Raw sequencing data will be deposited in NCBI GEO. Raw and summarized single-cell RNA-seq (Supp Table 2, 3, and 5) are provided.

## Field-specific reporting

Please select the one below that is the best fit for your research. If you are not sure, read the appropriate sections before making your selection.

- Life sciences     Behavioural & social sciences     Ecological, evolutionary & environmental sciences

For a reference copy of the document with all sections, see [nature.com/documents/nr-reporting-summary-flat.pdf](https://www.nature.com/documents/nr-reporting-summary-flat.pdf)

## Life sciences study design

All studies must disclose on these points even when the disclosure is negative.

|                 |                                                                                                                                                                                                                                                                                                                                 |
|-----------------|---------------------------------------------------------------------------------------------------------------------------------------------------------------------------------------------------------------------------------------------------------------------------------------------------------------------------------|
| Sample size     | No power analyses were used to predetermine sample sizes. However, sample sizes were informed by prior literature using similar experimental paradigms that yielded interpretable results and the lab's previous experience.                                                                                                    |
| Data exclusions | None.                                                                                                                                                                                                                                                                                                                           |
| Replication     | For in vivo experiments, biological replicates as well as independent cohorts of mice were used. ALPL inhibition and RNA-seq data were not replicated in independent experiments due to resource restrictions. All other data were successfully replicated in at least two independent experiments as stated in figure legends. |
| Randomization   | For ALPL inhibition studies, aged mice were randomized into 2 groups using a random list generator. For other studies, cages of young and aged mice of similar stays at the veterinary facility were allocated at random.                                                                                                       |
| Blinding        | All immunohistochemical analyses were performed by a blinded observer. In general, experimenters were blinded to group allocation during data acquisition and analysis.                                                                                                                                                         |

## Reporting for specific materials, systems and methods

We require information from authors about some types of materials, experimental systems and methods used in many studies. Here, indicate whether each material, system or method listed is relevant to your study. If you are not sure if a list item applies to your research, read the appropriate section before selecting a response.

### Materials & experimental systems

| n/a                                 | Involved in the study                                           |
|-------------------------------------|-----------------------------------------------------------------|
| <input type="checkbox"/>            | <input checked="" type="checkbox"/> Antibodies                  |
| <input checked="" type="checkbox"/> | <input type="checkbox"/> Eukaryotic cell lines                  |
| <input checked="" type="checkbox"/> | <input type="checkbox"/> Palaeontology                          |
| <input type="checkbox"/>            | <input checked="" type="checkbox"/> Animals and other organisms |
| <input checked="" type="checkbox"/> | <input type="checkbox"/> Human research participants            |
| <input checked="" type="checkbox"/> | <input type="checkbox"/> Clinical data                          |

### Methods

| n/a                                 | Involved in the study                              |
|-------------------------------------|----------------------------------------------------|
| <input checked="" type="checkbox"/> | <input type="checkbox"/> ChIP-seq                  |
| <input type="checkbox"/>            | <input checked="" type="checkbox"/> Flow cytometry |
| <input checked="" type="checkbox"/> | <input type="checkbox"/> MRI-based neuroimaging    |

## Antibodies

### Antibodies used

Flow cytometry: rat anti-CD31-PE/CF594 (1:100, clone MEC 13.3, BD, cat. No. 563616), rat anti-CD45-PE/Cy7 (1:200, clone 30-F11, Biolegend, cat. no. 103114), rat anti ACSA-2-PE (1:200, clone IH3-18A3, Miltenyi, cat. no. 130-102-365), mouse anti-NeuN-PE (1:100, clone A60, Millipore Sigma, cat. no. FCMAB317PE), and rat anti-CD90.2-FITC (1:100, clone 30-H12, Biolegend, cat. no. 105305)

Immunostaining primary antibodies: goat monoclonal anti-CD31 (1:100, AF3628, R&D), Fluorescein-labeled Lectin (1:200, Vector Laboratories), rabbit monoclonal anti-Aquaporin 4 (1:500, AB2218, Millipore Sigma), rat anti-CD13 (1:100, MCA2183EL, Bio-Rad), goat anti-Alpl/ ALPL (1:100, AF2909, R&D), mouse anti-NeuN (1:400, MAB377, Millipore), goat anti-albumin (1:100, NB600, Novus), rabbit anti-transferrin (1:100, ab82411, Abcam or 1:100, AF3987, R&D), rabbit anti-Collagen I (1:100, ab21286, Abcam), goat anti-Iba1 (1:500, ab5076, Abcam), rabbit anti-MFSD2A (1:300, gift from Chenghua Gu), rat anti-TFRC (1:100, Novus, NB100-64979), and rabbit anti-Phospho-Stat3 (1:100, 9145S, CST).

Immunostaining secondary antibodies: Alexa Fluor 488 donkey anti-goat-IgG (1:250; Invitrogen, A-11055); Alexa Fluor 488 donkey anti-rat-IgG (1:250; Invitrogen, A-21208); Alexa Fluor 555 donkey anti-mouse-IgG (1:250; Invitrogen, A-31570); Alexa Fluor 555 donkey anti-goat-IgG (1:250; Invitrogen, A-21432); Alexa Fluor 647 donkey anti-mouse-IgG (1:250; Invitrogen, A-31571); Alexa Fluor 647 donkey anti-rabbit-IgG (1:250; Invitrogen, A-31573); Alexa Fluor 647 donkey anti-goat-IgG (1:250; Invitrogen, A-21447); Alexa Fluor 647 donkey anti-rabbit-IgG (1:250; Invitrogen, A-31573); and Alexa Fluor 647 donkey anti-goat-IgG (1:250; Invitrogen, A-21447).

### Validation

All antibodies were validated for the indicated species and applications by the manufacturer.

## Animals and other organisms

Policy information about [studies involving animals](#); [ARRIVE guidelines](#) recommended for reporting animal research

|                         |                                                                                                                    |
|-------------------------|--------------------------------------------------------------------------------------------------------------------|
| Laboratory animals      | C57Bl/6 male mice, aged (20-24 months from NIA rodent colony), young (3 months from Charles River or Jackson Labs) |
| Wild animals            | This study did not involve wild animals.                                                                           |
| Field-collected samples | This study did not involve field-collected samples.                                                                |
| Ethics oversight        | Institutional Animal Care and Use Committee at Stanford University                                                 |

Note that full information on the approval of the study protocol must also be provided in the manuscript.

## Flow Cytometry

### Plots

Confirm that:

- The axis labels state the marker and fluorochrome used (e.g. CD4-FITC).
- The axis scales are clearly visible. Include numbers along axes only for bottom left plot of group (a 'group' is an analysis of identical markers).
- All plots are contour plots with outliers or pseudocolor plots.
- A numerical value for number of cells or percentage (with statistics) is provided.

### Methodology

|                           |                                                                                                                                                                                                                                                                                                    |
|---------------------------|----------------------------------------------------------------------------------------------------------------------------------------------------------------------------------------------------------------------------------------------------------------------------------------------------|
| Sample preparation        | For immunostaining, cells were passed through a 100 micron strainer, blocked for 10 minutes on ice with mouse Fc-blocking reagent (BD), and stained for 30 minutes in PBS supplemented with 1% bovine serum albumin.                                                                               |
| Instrument                | FACS: BD FACSAria III<br>Analysis: BD LSRFortessa                                                                                                                                                                                                                                                  |
| Software                  | BD FACS Diva, Cytobank                                                                                                                                                                                                                                                                             |
| Cell population abundance | For analysis of plasma uptake, at least 1,000 cells of the population of interest were analyzed.<br>Using plate-based scRNA-seq, 745 brain endothelial cells were analyzed for plasma uptake.<br>Using droplet-based scRNA-seq, 8,637 brain endothelial cells were analyzed after ALPL inhibition. |
| Gating strategy           | Positive and negative gates were set using unstained and fluorescence minus one (FMO) background intensity controls.<br>Fluorophores were chosen to minimize spectral overlap.                                                                                                                     |

- Tick this box to confirm that a figure exemplifying the gating strategy is provided in the Supplementary Information.
