# Supplementary material
Source: PubMed Central journal article supplement (PMC8331074)
Supplement: NIHMS1700821-supplement-Supplemental_Figure_1_and_Supplemental_Table_1_with_additional_References.pdf [file NIHMS1700821-supplement-Supplemental_Figure_1_and_Supplemental_Table_1_with_additional_References.pdf]

---

**Supplementary information**

---

# **Physiological blood–brain transport is impaired with age by a shift in transcytosis**

---

In the format provided by the authors and unedited

Andrew C. Yang, Marc Y. Stevens, Michelle B. Chen, Davis P. Lee, Daniel Stähli, David Gate, Kévin Contrepois, Winnie Chen, Tal Iram, Lichao Zhang, Ryan T. Vest, Aisling Chaney, Benoit Lehallier, Niclas Olsson, Haley du Bois, Ryan Hsieh, Haley C. Cropper, Daniela Berdnik, Lulin Li, Elizabeth Y. Wang, Gavin M. Traber, Carolyn R. Bertozzi, Jian Luo, Michael P. Snyder, Joshua E. Elias, Stephen R. Quake, Michelle L. James & Tony Wyss-Coray 

# Supplemental Figure 1

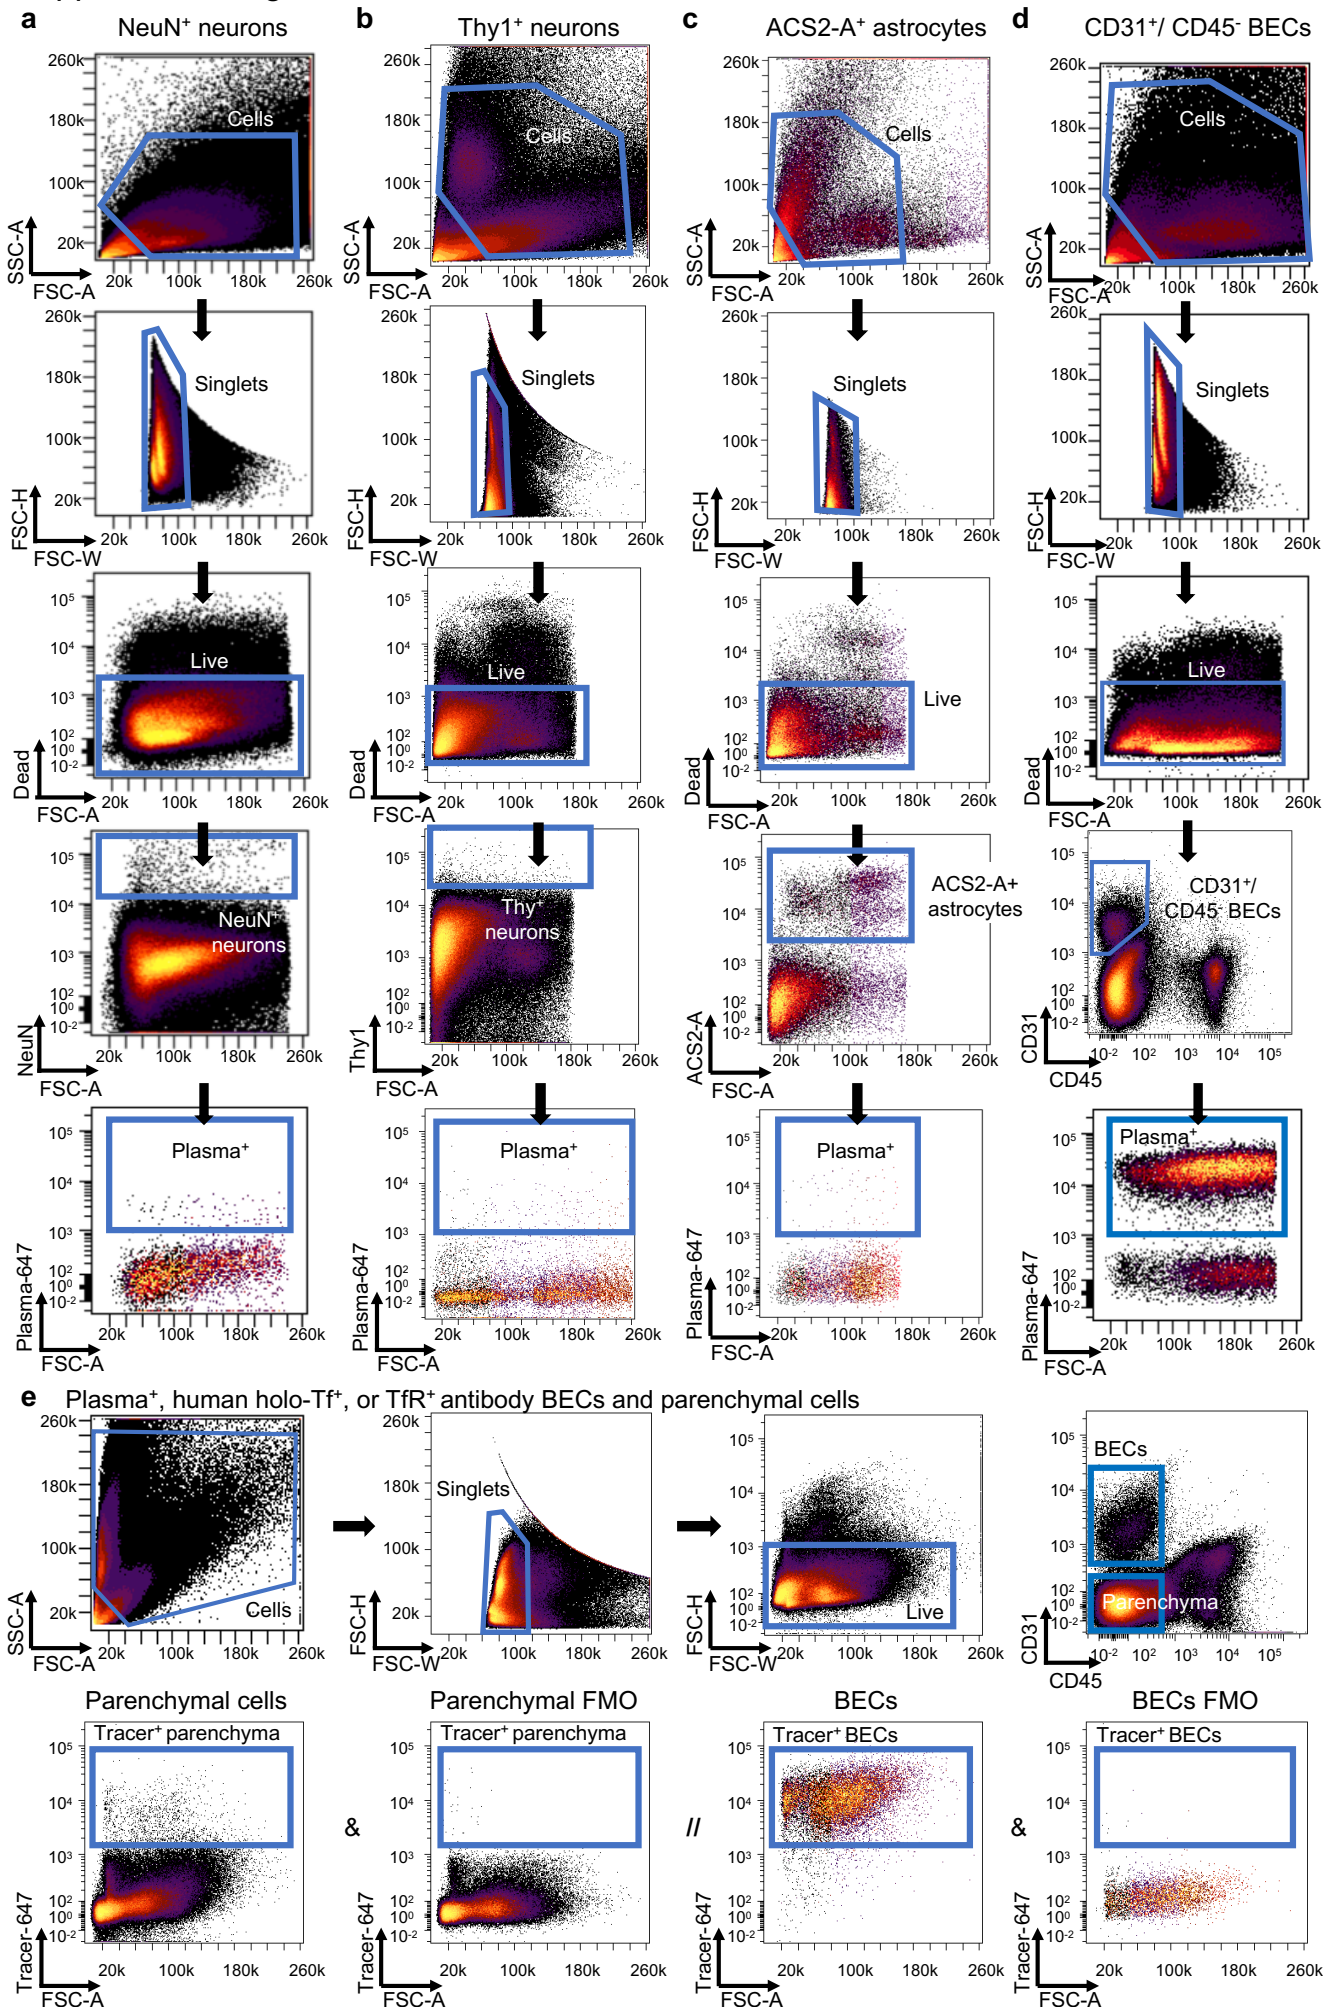

Supplementary Table 1 Tracers injected or perfused to probe BBB permeability

WB: Western Blot, FM: fluorescence microscopy, LM: light microscopy, TEM: transmission electron microscopy, MRI: magnetic resonance imaging, PET: positron emission tomography, ELISA: enzyme-linked immunosorbent assay

| Category        | Injected substance     | Wild-type/ healthy                                                            | Finding in wild-type control/ healthy                                                                                                                                                                                                                                                                                                           | Model/ disease                                                                                                                                                                                                                                                                                                                                                                                | Finding in model/ disease                                                                                                                                                                                                                                                                                                                                                                                                                                                                                                                                                                           | Detection method                                                                          |
|-----------------|------------------------|-------------------------------------------------------------------------------|-------------------------------------------------------------------------------------------------------------------------------------------------------------------------------------------------------------------------------------------------------------------------------------------------------------------------------------------------|-----------------------------------------------------------------------------------------------------------------------------------------------------------------------------------------------------------------------------------------------------------------------------------------------------------------------------------------------------------------------------------------------|-----------------------------------------------------------------------------------------------------------------------------------------------------------------------------------------------------------------------------------------------------------------------------------------------------------------------------------------------------------------------------------------------------------------------------------------------------------------------------------------------------------------------------------------------------------------------------------------------------|-------------------------------------------------------------------------------------------|
| Macro-molecules | Horseradish peroxidase | -C57BL/6 mice <sup>1,2</sup><br>-C57BL/6J mice <sup>3</sup>                   | -No uptake into BECs <sup>1</sup> .<br>-Increased uptake into BECs in old mice <sup>2</sup><br>-Low uptake into BECs <sup>3</sup>                                                                                                                                                                                                               | - <i>Mfsd2a</i> <sup>D96A</sup> mice<br>- <i>Smpd1</i> <sup>+/+</sup> mice <sup>2</sup><br>- <i>Pdgfb</i> <sup>ret/ret</sup> mice <sup>3</sup>                                                                                                                                                                                                                                                | -Uptake into BECs <sup>1</sup><br>-Reduced uptake in old tg mice compared to old WT mice <sup>2</sup><br>-Increased uptake into BECs <sup>3</sup>                                                                                                                                                                                                                                                                                                                                                                                                                                                   | -TEM, LM <sup>1</sup><br>-FM <sup>2</sup><br>-TEM <sup>3</sup>                            |
|                 | Bovine Serum Albumin   | -C57BL/6J mice <sup>3</sup><br>-B6/SJL mice <sup>4</sup>                      | -No accumulation in brain parenchyma <sup>3</sup><br>-Passive transport or fluid phase endocytosis <sup>4</sup>                                                                                                                                                                                                                                 | - <i>Pdgfb</i> <sup>ret/ret</sup> ,<br><i>R26P</i> <sup>+/0</sup> , <i>R26P</i> <sup>+/+</sup> mice <sup>3</sup><br>- <i>APP-PS1</i> mice <sup>4</sup>                                                                                                                                                                                                                                        | -Accumulation in brain parenchyma in <i>Pdgfb</i> <sup>ret/ret</sup> and less in <i>R26P</i> <sup>+/0</sup> but not in <i>R26P</i> <sup>+/+</sup> mice <sup>3</sup><br>-Decreased permeability compared to WT <sup>4</sup>                                                                                                                                                                                                                                                                                                                                                                          | -FM <sup>3</sup><br>-Radiotracing <sup>4</sup>                                            |
|                 | Exogenous IgG          | C57BL/6J mice <sup>3,5</sup>                                                  | -Intact BBB with no difference between young and aged mice <sup>5</sup><br>-No accumulation in brain parenchyma <sup>3</sup>                                                                                                                                                                                                                    | - <i>PS2-APP</i> mice <sup>5</sup><br>- <i>Pdgfb</i> <sup>ret/ret</sup> ,<br><i>R26P</i> <sup>+/0</sup> , <i>R26P</i> <sup>+/+</sup> mice <sup>3</sup>                                                                                                                                                                                                                                        | -No difference in BBB permeability compared to WT <sup>5</sup><br>-Accumulation in brain parenchyma in <i>Pdgfb</i> <sup>ret/ret</sup> and less in <i>R26P</i> <sup>+/0</sup> but not in <i>R26P</i> <sup>+/+</sup> mice. Treatment with Imatinib rescues leaky phenotype <sup>3</sup>                                                                                                                                                                                                                                                                                                              | -Radiotracing, WB <sup>5</sup><br>-FM <sup>3</sup>                                        |
|                 | Human insulin          | B6/SJL mice                                                                   | Insulin undergoes receptor-mediated transcytosis                                                                                                                                                                                                                                                                                                | <i>APP-PS1</i> mice                                                                                                                                                                                                                                                                                                                                                                           | Increased permeability                                                                                                                                                                                                                                                                                                                                                                                                                                                                                                                                                                              | Radiotracing <sup>4</sup>                                                                 |
|                 | Dextran (≤10 kDa)      | C57BL/6 mice <sup>1,2,5,6</sup>                                               | -Confined to vasculature <sup>6</sup><br>-Leakage into parenchyma in old mice <sup>2</sup><br>-Confined to vasculature <sup>1</sup><br>-Intact BBB with no difference between young and aged mice <sup>5</sup>                                                                                                                                  | - <i>Mfsd2a</i> <sup>-/-</sup> mice <sup>6</sup><br>- <i>Smpd1</i> <sup>+/+</sup> mice <sup>2</sup><br>- <i>Mfsd2a</i> <sup>D96A</sup> mice <sup>1</sup><br><i>Mfsd2a</i> ; <i>Cav1</i> single and double KO mice <sup>1</sup><br>- <i>PS2-APP</i> mice <sup>5</sup>                                                                                                                          | -Increased BBB permeability <sup>6</sup><br>-Leaky phenotype in old mice is rescued in Tg model <sup>2</sup><br>-Increased transcytosis into parenchyma <sup>1</sup><br>-Increased permeability only in <i>Mfsd2a</i> KO. Phenotype is rescued in double KO<br>-No difference in BBB permeability compared to WT <sup>5</sup>                                                                                                                                                                                                                                                                       | -FM <sup>6</sup><br>-FM <sup>2</sup><br>-FM, LM <sup>1</sup><br>-Radiotracer <sup>5</sup> |
|                 | Dextran (>10 kDa)      | -C57BL/6 mice <sup>2,7,8</sup><br>-C57BL/6J <sup>3</sup>                      | -Large dextrans are leaking less into old mice parenchyma compared to smaller dextrans - Almost no leakage for 2000 kDa dextran <sup>2</sup><br>-Confined to vasculature <sup>8</sup><br>-No accumulation in parenchyma <sup>3</sup>                                                                                                            | - <i>Smpd1</i> <sup>+/+</sup> mice <sup>2</sup><br>- <i>ApoE</i> <sup>-/-</sup> , <i>TR-APOE2</i> , <i>TR-APOE3</i> , <i>TR-APOE4</i> , <i>GFAP-APOE4</i> , <i>ApoE</i> <sup>-/-</sup><br><i>Ppia</i> <sup>-/-</sup> mice <sup>8</sup><br><i>Pdgfb</i> <sup>ret/ret</sup> ,<br><i>R26P</i> <sup>+/0</sup> , <i>R26P</i> <sup>+/+</sup> mice <sup>3</sup><br>- <i>Ny1-KO</i> mice <sup>7</sup> | -Leaky phenotype in old mice is rescued in Tg model <sup>2</sup><br>-Increased permeability in <i>ApoE</i> <sup>-/-</sup> , <i>APOE4</i> mice which increases with age; Leaky BBB phenotype is rescued by <i>CypA</i> inhibition and in <i>ApoE</i> <sup>-/-</sup> <i>Ppia</i> <sup>-/-</sup> mice <sup>8</sup><br>-Accumulation in brain parenchyma in <i>Pdgfb</i> <sup>ret/ret</sup> and less in <i>R26P</i> <sup>+/0</sup> but not in <i>R26P</i> <sup>+/+</sup> mice. Treatment with imatinib rescues leaky phenotype <sup>3</sup><br>-Increased permeability compared to control <sup>7</sup> | FM <sup>2,3,7,8</sup>                                                                     |
|                 | IgG brain shuttles     | -C57BL/6 mice <sup>5,9,10</sup><br>-Male Sprague Dawley Rats <sup>11,12</sup> | -Anti-TfR-BACE1, -Glut1 and -CD98hc Abs enter brain parenchyma <sup>5,9</sup><br>-Anti-TfR Ab extravasates into the brain <sup>12</sup><br>-Enhanced uptake of MTX into brain parenchyma using α-TfR Ab as shuttle <sup>11</sup><br>-Low-affinity α-TfR bispecific Ab enters the brain and experiences less lysosomal degradation <sup>10</sup> | <i>PS2-APP</i> mice <sup>5</sup>                                                                                                                                                                                                                                                                                                                                                              | No difference in BBB permeability compared to WT <sup>5</sup>                                                                                                                                                                                                                                                                                                                                                                                                                                                                                                                                       | -FM, ELISA <sup>9,10</sup><br>-Radiotracing <sup>5,9-12</sup><br>-WB <sup>10</sup>        |
|                 | Mab86                  | C57BL/6 mice                                                                  | Mab86 is confined within the vasculature                                                                                                                                                                                                                                                                                                        | <i>Tau-PS2-APP-pdgfb</i> <sup>ret/ret</sup> mice                                                                                                                                                                                                                                                                                                                                              | Increased accumulation of Mab86 in hippocampus                                                                                                                                                                                                                                                                                                                                                                                                                                                                                                                                                      | FM <sup>13</sup>                                                                          |
|                 | Human Aβ1–40           | B6/SJL mice                                                                   | Aβ1–40 undergoes receptor-mediated transcytosis                                                                                                                                                                                                                                                                                                 | <i>APP-PS1</i> mice                                                                                                                                                                                                                                                                                                                                                                           | No difference for Aβ1–40 compared to B6/SJL mice                                                                                                                                                                                                                                                                                                                                                                                                                                                                                                                                                    | Radiotracing <sup>4</sup>                                                                 |
|                 | Albumin                | C57BL/6 mice <sup>5</sup>                                                     | Present in brain lysates. No difference with age <sup>5</sup>                                                                                                                                                                                                                                                                                   | <i>PS2-APP</i> mice <sup>5</sup>                                                                                                                                                                                                                                                                                                                                                              | No difference with age and between <i>PS2-APP</i> to WT <sup>5</sup>                                                                                                                                                                                                                                                                                                                                                                                                                                                                                                                                | Radiotracing, WB <sup>5</sup>                                                             |

|                            |                          |                                                                                                                          |                                                                                                                                                                                                                                                                                                                                                                  |                                                                                                                                                                                                                                                                                                                                                                    |                                                                                                                                                                                                                                                                                                                                                                                                                     |                                                                                                                   |
|----------------------------|--------------------------|--------------------------------------------------------------------------------------------------------------------------|------------------------------------------------------------------------------------------------------------------------------------------------------------------------------------------------------------------------------------------------------------------------------------------------------------------------------------------------------------------|--------------------------------------------------------------------------------------------------------------------------------------------------------------------------------------------------------------------------------------------------------------------------------------------------------------------------------------------------------------------|---------------------------------------------------------------------------------------------------------------------------------------------------------------------------------------------------------------------------------------------------------------------------------------------------------------------------------------------------------------------------------------------------------------------|-------------------------------------------------------------------------------------------------------------------|
| <b>Endogenous proteins</b> | IgG                      | -C57BL/6 mice <sup>5,7,8,13</sup><br>-Human patients <sup>14</sup>                                                       | -Present in intracellular vesicles in BECs <sup>13</sup><br>-Present in brain lysates. No difference with age <sup>5</sup><br>-Restricted to vasculature and ventricles <sup>7</sup><br>-No IgG in parenchyma <sup>8</sup><br>IgG, IgA, IgM, alpha-2 macroglobulin in brain vasculature, neuropil and in neuronal cell bodies in normal aged brain <sup>14</sup> | - <i>Pdgfb<sup>ret/ret</sup></i> mice <sup>13</sup><br>- <i>Tau-PS2-APP-pdgfb<sup>ret/ret</sup></i> mice <sup>13</sup><br>-EAE mice <sup>15</sup><br>-N $\gamma$ 1-KO mice <sup>7</sup><br>- <i>Apo<sup>e</sup>-/-</i> , <i>TR-APOE3</i> , <i>TR-APOE4</i> , <i>TR-APOE4 Ppia<sup>-/-</sup></i> , <i>GFAP-APOE4</i> , <i>Apo<sup>e</sup>-/-Ppia<sup>-/-8</sup></i> | -Less IgG positive vesicles in BECs <sup>13</sup><br>-Increased accumulation in parenchyma <sup>13</sup><br>-Increased permeability<br>-Lack of astrocytic laminin induces BBB breakdown <sup>7</sup><br>-Increased leakage into the brain in <i>Apo<sup>e</sup>-/-</i> and <i>APOE4</i> mice and with age. Leaky phenotype is rescued by <i>CypA</i> inhibition and in <i>Ppia<sup>-/-</sup></i> mice <sup>8</sup> | -FM <sup>13</sup><br>-WB <sup>15</sup><br>-FM, TEM <sup>7</sup><br>-FM, WB <sup>8</sup><br>-FM, TEM <sup>14</sup> |
|                            | Hemosiderin              | C57BL/6 mice                                                                                                             | No hemosiderin deposits in sagittal brain sections                                                                                                                                                                                                                                                                                                               | <i>Apo<sup>e</sup>-/-</i> , <i>GFAP-APOE3</i> , <i>GFAP-APOE4</i> , <i>TR-APOE3</i> , <i>TR-APOE4</i> mice                                                                                                                                                                                                                                                         | Leaky phenotype in <i>Apo<sup>e</sup>-/-</i> , <i>APOE4</i> mice which increases with age. <i>CypA</i> inhibition can normalize hemosiderin levels                                                                                                                                                                                                                                                                  | LM <sup>8</sup>                                                                                                   |
|                            | Fibrin (-ogen)           | C57BL/6 mice                                                                                                             | Low levels in brain                                                                                                                                                                                                                                                                                                                                              | <i>Apo<sup>e</sup>-/-</i> , <i>GFAP-APOE3</i> , <i>GFAP-APOE4</i> mice                                                                                                                                                                                                                                                                                             | Leaky phenotype in <i>Apo<sup>e</sup>-/-</i> , <i>GFAP-APOE4</i> mice; fibrin accumulates in neurons. <i>CypA</i> inhibition normalizes fibrin levels                                                                                                                                                                                                                                                               | FM <sup>8</sup>                                                                                                   |
|                            | Thrombin                 | C57BL/6 mice                                                                                                             | Low levels in brain                                                                                                                                                                                                                                                                                                                                              | <i>Apo<sup>e</sup>-/-</i> , <i>GFAP-APOE3</i> , <i>GFAP-APOE4</i> mice                                                                                                                                                                                                                                                                                             | Leaky phenotype in <i>Apo<sup>e</sup>-/-</i> , <i>GFAP-APOE4</i> mice; accumulates in neurons. <i>CypA</i> inhibition normalizes thrombin levels                                                                                                                                                                                                                                                                    | FM, WB <sup>8</sup>                                                                                               |
|                            | Leptin                   | C57BL/6J mice                                                                                                            | Accumulation in mediobasal hypothalami and ventricular system                                                                                                                                                                                                                                                                                                    | Obesity                                                                                                                                                                                                                                                                                                                                                            | Accumulation predominantly in mediobasal hypothalami and ventricular system                                                                                                                                                                                                                                                                                                                                         | FM <sup>16</sup>                                                                                                  |
| <b>Small molecules</b>     | Evans Blue               | -Rat <sup>17</sup><br>C57BL/6 mice <sup>7</sup><br>-Male Sprague Dawley rat <sup>18</sup><br>-C57BL/6J mice <sup>3</sup> | -Leakage into eye tissue without astrocytes <sup>17</sup><br>-Confined to ventricles<br>Almost no signal elsewhere <sup>7</sup><br>-No EB in brain parenchyma <sup>18</sup><br>-No accumulation in brain parenchyma <sup>3</sup>                                                                                                                                 | -Injection of astrocytes into eye <sup>17</sup><br>-N $\gamma$ 1-KO mice <sup>7</sup><br>-Induced seizure <sup>18</sup><br>- <i>Pdgfb<sup>ret/ret</sup></i> , <i>R26P<sup>+/-</sup></i> , <i>R26P<sup>+/+</sup></i> mice <sup>3</sup>                                                                                                                              | -No leakage with astrocytes implanted <sup>17</sup><br>-Lack of astrocytic laminin induces BBB breakdown and pericyte differentiation <sup>7</sup><br>-Increased permeability <sup>18</sup><br>-Accumulation in brain parenchyma in <i>Pdgfb<sup>ret/ret</sup></i> and less in <i>R26P<sup>+/-</sup></i> but not in <i>R26P<sup>+/+</sup></i> mice <sup>3</sup>                                                     | -LM <sup>17</sup><br>-FM, TEM <sup>7</sup><br>-LM <sup>18</sup><br>-LM, FM <sup>3</sup>                           |
|                            | Cadaverine               | C57BL/6J mice <sup>3,8</sup>                                                                                             | No accumulation in brain parenchyma <sup>19</sup>                                                                                                                                                                                                                                                                                                                | - <i>TR-APOE3 Ppia<sup>-/-</sup></i> mice treated with siLrp1 <sup>8</sup><br>- <i>Pdgfb<sup>ret/ret</sup></i> , <i>R26P<sup>+/-</sup></i> , <i>R26P<sup>+/+</sup></i> mice <sup>20</sup>                                                                                                                                                                          | -Leaky phenotype in siLrp1 treated <i>TR-APOE3</i> but not in <i>Ppia<sup>-/-</sup></i> mice <sup>8</sup><br>-Accumulation in parenchyma and neurons in <i>Pdgfb<sup>ret/ret</sup></i> and less in <i>R26P<sup>+/-</sup></i> but not in <i>R26P<sup>+/+</sup></i> mice<br>-Treatment with imatinib rescues leaky phenotype <sup>20</sup>                                                                            | FM <sup>3,8</sup>                                                                                                 |
|                            | Sodium fluorescein       | Sprague Dawley Rat                                                                                                       | Confined to vasculature                                                                                                                                                                                                                                                                                                                                          | -Induced seizure<br>-Excessive glutamate concentrations                                                                                                                                                                                                                                                                                                            | Increased permeability to sodium fluorescein                                                                                                                                                                                                                                                                                                                                                                        | FM <sup>18</sup>                                                                                                  |
|                            | Riboflavin               | Albino rat                                                                                                               | Can pass the BBB and uptake is dose-dependent                                                                                                                                                                                                                                                                                                                    | -                                                                                                                                                                                                                                                                                                                                                                  | -                                                                                                                                                                                                                                                                                                                                                                                                                   | Lumiflavin fluorescence <sup>21</sup>                                                                             |
|                            | Lyso-phosphatidylcholine | NOD-SCID mice                                                                                                            | Uptake into parenchyma                                                                                                                                                                                                                                                                                                                                           | Xenograft models of brain metastases                                                                                                                                                                                                                                                                                                                               | Reduced permeability to lysophosphatidylcholine compared to WT                                                                                                                                                                                                                                                                                                                                                      | FM <sup>22</sup>                                                                                                  |
|                            | Gadolinium               | Human patients <sup>23-25</sup>                                                                                          | -Increased hippocampal permeability <sup>24</sup><br>-Does not enter the brain <sup>23</sup>                                                                                                                                                                                                                                                                     | -MCI <sup>24</sup><br>-MCI, early AD <sup>25</sup><br>-AD <sup>23</sup>                                                                                                                                                                                                                                                                                            | -Increased hippocampal permeability <sup>24</sup><br>-Increased leakage in hippocampus in MCI and in grey and white matter in early AD <sup>25</sup><br>-No BBB breakdown in AD <sup>23</sup>                                                                                                                                                                                                                       | -MR <sup>24,25</sup><br>-PET <sup>23</sup>                                                                        |
|                            | Pyruvate                 | -Rat<br>-Pig                                                                                                             | Pyruvate (and lactate) confined to vasculature                                                                                                                                                                                                                                                                                                                   | -Metastasis model to the brain<br>-Mannitol osmotic shock                                                                                                                                                                                                                                                                                                          | -Lactate production corresponds with BBB breakdown in the disease<br>-Increased permeability                                                                                                                                                                                                                                                                                                                        | MR <sup>26</sup>                                                                                                  |
|                            | Fluorodeoxyglucose (FDG) | Human patients                                                                                                           | Glucose uptake into brain                                                                                                                                                                                                                                                                                                                                        | Age-related cognitive decline and AD                                                                                                                                                                                                                                                                                                                               | Diminished glucose transport                                                                                                                                                                                                                                                                                                                                                                                        | PET <sup>27</sup>                                                                                                 |
|                            | Rubidium chloride        | C57BL/6 mice                                                                                                             | Intact BBB, no difference between young and aged                                                                                                                                                                                                                                                                                                                 | <i>PS2-APP</i> mice                                                                                                                                                                                                                                                                                                                                                | No difference in BBB permeability compared to WT                                                                                                                                                                                                                                                                                                                                                                    | Radiotracing <sup>5</sup>                                                                                         |

## References

1. Andreone, B. J. *et al.* Blood-Brain Barrier Permeability Is Regulated by Lipid Transport-Dependent Suppression of Caveolae-Mediated Transcytosis. *Neuron* (2017). doi:10.1016/j.neuron.2017.03.043
2. Park, M. H. *et al.* Vascular and Neurogenic Rejuvenation in Aging Mice by Modulation of ASM. *Neuron* (2018). doi:10.1016/j.neuron.2018.09.010
3. Armulik, A. *et al.* Pericytes regulate the blood-brain barrier. *Nature* **468**, 557–561 (2010).
4. Poduslo, J. F., Curran, G. L., Wengenack, T. M., Malester, B. & Duff, K. Permeability of proteins at the blood-brain barrier in the normal adult mouse and double transgenic mouse model of Alzheimer's disease. *Neurobiol. Dis.* (2001). doi:10.1006/nbdi.2001.0402
5. Bien-Ly, N. *et al.* Lack of Widespread BBB Disruption in Alzheimer's Disease Models: Focus on Therapeutic Antibodies. *Neuron* **88**, 289–297 (2015).
6. Ben-Zvi, A. *et al.* Mfsd2a is critical for the formation and function of the blood-brain barrier. *Nature* (2014). doi:10.1038/nature13324
7. Yao, Y., Chen, Z. L., Norris, E. H. & Strickland, S. Astrocytic laminin regulates pericyte differentiation and maintains blood brain barrier integrity. *Nat. Commun.* (2014). doi:10.1038/ncomms4413
8. Bell, R. D. *et al.* Apolipoprotein e controls cerebrovascular integrity via cyclophilin A. *Nature* (2012). doi:10.1038/nature11087
9. Zuchero, Y. J. Y. *et al.* Discovery of Novel Blood-Brain Barrier Targets to Enhance Brain Uptake of Therapeutic Antibodies. *Neuron* (2016). doi:10.1016/j.neuron.2015.11.024
10. Bien-Ly, N. *et al.* Transferrin receptor (TfR) trafficking determines brain uptake of TfR antibody affinity variants. *J. Exp. Med.* (2014). doi:10.1084/jem.20131660
11. Friden, P. M. *et al.* Anti-transferrin receptor antibody and antibody-drug conjugates cross the blood-brain barrier. *Proc. Natl. Acad. Sci.* (2006). doi:10.1073/pnas.88.11.4771
12. Pardridge, W. M., Buciak, J. L. & Friden, P. M. Selective transport of an anti-transferrin receptor antibody through the blood-brain barrier in vivo. *J. Pharmacol. Exp. Ther.* (1991).
13. Villasenõr, R. *et al.* Trafficking of Endogenous Immunoglobulins by Endothelial Cells at the Blood-Brain Barrier. *Sci. Rep.* **6**, 1–10 (2016).
14. Pappolla, M. A. & Andorn, A. C. Serum protein leakage in aged human brain and inhibition of ligand binding at alpha2- adrenergic and cholinergic binding sites. *Synapse* (1987). doi:10.1002/syn.890010111
15. Zuchero, Y. J. Y. *et al.* Discovery of Novel Blood-Brain Barrier Targets to Enhance Brain Uptake of Therapeutic Antibodies. *Neuron* (2016). doi:10.1016/j.neuron.2015.11.024
16. Harrison, L. *et al.* Fluorescent blood–brain barrier tracing shows intact leptin transport in obese mice. *International Journal of Obesity* (2018). doi:10.1038/s41366-018-0221-z
17. Janzer, R. C. & Raff, M. C. Astrocytes induce blood-brain barrier properties in endothelial cells. *Nature* (1987). doi:10.1038/325253a0
18. Vazana, U. *et al.* Glutamate-Mediated Blood-Brain Barrier Opening: Implications for Neuroprotection and Drug Delivery. *J. Neurosci.* (2016). doi:10.1523/jneurosci.0587-16.2016
19. Armulik, A. *et al.* Pericytes regulate the blood-brain barrier. *Nature* (2010). doi:10.1038/nature09522
20. Armulik, A., Genové, G. & Betsholtz, C. Pericytes: Developmental, Physiological, and Pathological Perspectives, Problems, and Promises. *Developmental Cell* (2011). doi:10.1016/j.devcel.2011.07.001
21. Nagatsu-Ishibashi, I., Nagatsu, T. & Yagi, K. Changes of quantity of flavin in the brain after peripheral administration of flavins. *Nature* (1961). doi:10.1038/190728a0
22. Tiwary, S. *et al.* Metastatic brain tumors disrupt the blood-brain barrier and alter lipid metabolism by inhibiting expression of the endothelial cell fatty acid transporter Mfsd2a. *Sci. Rep.* (2018). doi:10.1038/s41598-018-26636-6

23. Schlageter, N. L., Carson, R. E. & Rapoport, S. I. Examination of blood-brain barrier permeability in dementia of the Alzheimer type with [68Ga]EDTA and positron emission tomography. *J. Cereb. Blood Flow Metab.* (1987). doi:10.1038/jcbfm.1987.1
24. Montagne, A. *et al.* Blood-Brain barrier breakdown in the aging human hippocampus. *Neuron* **85**, 296–302 (2015).
25. van de Haar, H. J. *et al.* Neurovascular unit impairment in early Alzheimer's disease measured with magnetic resonance imaging. *Neurobiol. Aging* (2016). doi:10.1016/j.neurobiolaging.2016.06.006
26. Miller, J. J. *et al.* 13C Pyruvate Transport Across the Blood-Brain Barrier in Preclinical Hyperpolarised MRI. *Sci. Rep.* (2018). doi:10.1038/s41598-018-33363-5
27. Hunt, A. *et al.* Reduced cerebral glucose metabolism in patients at risk for Alzheimer's disease. *Psychiatry Res. - Neuroimaging* (2007). doi:10.1016/j.pscychresns.2006.12.003
